1 **Bacterial behavior in human blood reveals complement evaders**  
2 **with persister-like features**

3 Short title: Complement evaders

4  
5 Stéphane Pont<sup>1</sup>, Nathan Fraikin<sup>2</sup>, Yvan Caspar<sup>3, 4</sup>, Laurence Van Melderen<sup>2</sup>, Ina  
6 Attrée\*<sup>1</sup> and François Cretin\*<sup>1</sup>

7  
8 <sup>1</sup>Université Grenoble Alpes, Bacterial Pathogenesis and Cellular Responses team, CNRS  
9 ERL5261, CEA IRIG-BCI, INSERM UMR1036, Grenoble, France

10 <sup>2</sup>Université Libre de Bruxelles, Department of Molecular Biology, Cellular & Molecular  
11 Microbiology, B-6041 Gosselies, Belgium

12 <sup>3</sup>Centre Hospitalier Universitaire Grenoble Alpes, Laboratoire de bactériologie-Hygiène  
13 hospitalière, Grenoble, France

14 <sup>4</sup>Université Grenoble Alpes, CNRS, Grenoble INP, TIMC-IMAG, F-38000 Grenoble, France

15 \*Correspondance to [francois.cretin@cea.fr](mailto:francois.cretin@cea.fr); [ina.attree-delic@cea.fr](mailto:ina.attree-delic@cea.fr)  
16

17

18

19

20

21

22

## 23 **Abstract**

24 Bacterial bloodstream infections (BSI) are a major health concern and can cause up  
25 to 40% mortality. *Pseudomonas aeruginosa* BSI is often of nosocomial origin and is  
26 associated with a particularly poor prognosis. The mechanism of bacterial persistence  
27 in blood is still largely unknown. Here, we analyzed the behavior of a cohort of clinical  
28 and laboratory *Pseudomonas aeruginosa* strains in human blood. In this specific  
29 environment, complement was the main defensive mechanism, acting either by direct  
30 bacterial lysis or by opsonophagocytosis, which required recognition by immune cells.  
31 We found highly variable survival rates for different strains in blood, whatever their  
32 origin, serotype, or the nature of their secreted toxins and despite their detection by  
33 immune cells. We identified and characterized a complement-tolerant subpopulation  
34 of bacterial cells that we named “evaders”. Evaders represented 0.1-0.001% of the  
35 initial bacterial load and displayed transient tolerance. Although evaders shared some  
36 features with bacterial persisters, which tolerate antibiotic treatment, they appear to  
37 have evolved distinct strategies to escape complement. We detected the evaders for  
38 five other major human pathogens: *Acinetobacter baumannii*, *Burkholderia*  
39 *multivorans*, enteroaggregative *Escherichia coli*, *Klebsiella pneumoniae*, and *Yersinia*  
40 *enterocolitica*. Thus, the evaders could allow the pathogen to persist within the  
41 bloodstream, and may be the cause of fatal bacteremia or dissemination, notably in  
42 the absence of effective antibiotic treatments.

43

44

45

46 **Author summary for “Complement evaders”**

47 Blood infections by antibiotic resistant bacteria, notably *Pseudomonas aeruginosa*, are  
48 major concerns in hospital settings. The complex interplay between *P. aeruginosa* and  
49 the innate immune system in the context of human blood is still poorly understood. By  
50 studying the behavior of various *P. aeruginosa* strains in human whole blood and  
51 plasma, we showed that bacterial strains display different rate of tolerance to the  
52 complement system. Despite the complement microbicide activity, most bacteria  
53 withstand elimination through phenotypic heterogeneity creating a tiny (<0.1%)  
54 subpopulation of transiently tolerant evaders. While genetically identical to the rest of  
55 the complement-sensitive population, evaders allow the bacteria to persist in plasma.  
56 This phenotypic heterogeneity thus prevents total elimination of the pathogen from the  
57 circulation, and represent a new strategy to disseminate within the organism.

58

59

## 60 Introduction

61 The incidence of bacterial bloodstream infections (BSI) in high-income countries is as  
62 extensive as that of strokes, ranging from 113 to 204 cases per 100,000 inhabitants [1].  
63 BSI, whether nosocomial or community-acquired, have poor prognosis, with mortality  
64 rates up to 40% [1,2]. They are also a leading cause of healthcare-associated  
65 infections in intensive care units (ICUs) [3] and neonatal wards [4], and are particularly  
66 prevalent in elderly patients (6,000 cases per 100,000 population). In this  
67 demographic, mortality rates can be up to 70% [5]. Their extensive impact on overall  
68 hospital costs (>\$40,000 per patient in the US) [6] make BSI a major public health  
69 concern.

70 Many different bacterial species can cause BSI, among which *Escherichia coli*,  
71 *Staphylococcus aureus*, *Klebsiella* species, *Pseudomonas aeruginosa*, *enterococci*,  
72 *streptococci* and coagulase-negative *staphylococci* are the most prominent [1]. *P.*  
73 *aeruginosa* is mainly associated with nosocomial infections, and bacteremia caused  
74 by this pathogen has a poor prognosis [2,7,8] with very high mortality rates [9]. *P.*  
75 *aeruginosa* can survive in many different environments and colonizes plants, animals,  
76 and humans [10]. In addition to BSI, it is responsible for a number of life-threatening  
77 complications including acute pneumonia and skin infection in immunocompromised  
78 and elderly patients, as well as degradation of lung function in chronically-infected  
79 cystic fibrosis patients [11]. The major health concerns related to *P. aeruginosa* are  
80 linked to intrinsic and acquired resistance to currently available antibiotics [12].

81 The capacity of *P. aeruginosa* to survive in the human body hinges on a balance  
82 between its numerous virulence factors and the presence of multiple host-defense  
83 mechanisms. Regardless of the primary site of infection, *P. aeruginosa* can cross the

84 epithelial and endothelial barriers to reach the bloodstream [13,14]. In the blood, the  
85 bacteria encounter the innate immune system, composed essentially of neutrophils,  
86 monocytes, and the complement system. Interactions between *P. aeruginosa* and this  
87 innate immune system have mainly been studied using selected strains and purified  
88 components, such as isolated complement proteins or phagocytes, or serum [15–20],  
89 in conditions differing from those found in the human blood [21,22]. Recent data  
90 indicated that systemic *P. aeruginosa* infection could lead to pathogen transmission as  
91 the bacteria were found to disseminate and propagate through the gallbladder and  
92 intestinal tract in a murine model of infection [23]. However, the mechanisms allowing  
93 bacteria to persist in the blood remained unclear. Within this study, we examined the  
94 behavior of a number of laboratory and recently isolated clinical *P. aeruginosa* strains  
95 in a standardized assay using fresh whole blood from healthy donors. Our results  
96 showed that, although complement exerts an essential antibacterial activity in the  
97 blood, individual bacterial strains display variable levels of tolerance. We evidenced,  
98 even for the most sensitive strains, the characteristic biphasic killing curves  
99 reminiscent of antibiotic persisters, and characterized a small subpopulation of  
100 phenotypic variants that we named complement evaders. These rare cells withstand  
101 complement-mediated lysis through phenotypic heterogeneity. Moreover, we  
102 discovered that several other major Gram-negative human pathogens shared the  
103 same capacity to escape human complement by forming intrinsically plasma-resistant  
104 evaders. The complement evaders may have a very significant impact on bacterial  
105 dissemination.

106

107

108

## 109 **Results**

### 110 **Laboratory and clinical strains display diverse survival rates in human blood**

111 Using a highly standardized method in human whole blood (HWB), we examined the  
112 survival of six *P. aeruginosa* strains with distinct toxin repertoires and serotypes (Fig  
113 1). These assays included the commonly used laboratory strains PAO1 [24], PA14 [25]  
114 and PA7 [26], which belong to distinct phylogenetic lineages/groups . PAO1 and PA14  
115 both possess the type III secretion system (T3SS) which they use to translocate ExoS  
116 or ExoU, respectively, into target host cells. PA7 lacks T3SS genes, but encodes the  
117 pore-forming toxin Exolysin A [26,27]. In addition to these laboratory strains, we  
118 included in the survey three *P. aeruginosa* strains recently isolated from infected  
119 patients [27–29]. *E. coli* CF7968, a derivative of the K12 laboratory strain [30] was  
120 added as a control (Table S1). Bacteria were incubated for 3 h in HWB from healthy  
121 donors, and bacterial survival was assessed in ten independent experiments by  
122 counting colony-forming units (CFU) (Fig 1A). Strains showed clearly distinguishable  
123 and reproducible survival rates. Approximately 10% of the laboratory and reference  
124 strains, PAO1 (ExoS<sup>+</sup>) and PA7 (ExIA<sup>+</sup>), survived, whereas only around 1% of the most  
125 sensitive strain, PA14 (ExoU<sup>+</sup>), was still present following the 3-h incubation in HWB.  
126 Very different survival rates were measured for the three recent clinical strains, YIK  
127 (ExoU<sup>+</sup>), CLJ1 and IHMA87 (ExIA<sup>+</sup>), ranging from 0.05% for CLJ1 to complete  
128 tolerance for YIK. Only the non-pathogenic laboratory strain *E. coli* CF7968 was  
129 completely eliminated, with no detectable CFU after 3 h exposure to HWB. The nature  
130 of the strain's virulence factors (T3SS versus ExIA) did not appear to confer any  
131 significant benefit for survival, as similar sensitivities were measured for ExIA<sup>+</sup> strains

132 and T3SS<sup>+</sup> strains (e.g. IHMA87 versus PA14, or PA7 versus PAO1). In addition,  
133 survival in HWB did not correlate with a given serotype, as highly variable survival rates  
134 were measured for the three O12 strains (Fig 1B). Lack of the O antigen was  
135 detrimental for the bacteria, as illustrated by the hypersensitivity of *E. coli* CF7968.

136

137 **Intrinsic *P. aeruginosa* tolerance in blood is linked to complement activity,**  
138 **through either MAC insertion or opsonophagocytosis**

139 To explore the origin of the extensive differences in survival measured in HWB, we first  
140 determined how well each strain was recognized by immune cells. While YIK induced  
141 marginal TNF $\alpha$  and IL6 production, all the other strains tested triggered similar high  
142 levels of cytokines (Fig S1). The toxins ExoS, ExoU, and Exolysin A are known to  
143 induce apoptosis or necrosis in a variety of eukaryotic cells, including white blood cells  
144 which may play a role in bacterial clearance from the blood [16,31–34]. We therefore  
145 examined the cytotoxic potential of each strain toward circulating leukocytes. YIK  
146 induced the highest cell death in both neutrophils and mononuclear cells, whereas  
147 most other strains showed similar limited levels of cytotoxic potential with no significant  
148 differences (Fig S2). Thus, except for YIK, the extent to which the bacterial strains  
149 tested were recognized by and destroyed circulating leukocytes could not explain the  
150 different survival rates measured in HWB.

151 We next assessed the capacity of the strains to cope with the complement system in  
152 plasma (Fig 2A). As with bacterial survival in HWB, in plasma the survival rates for the  
153 six selected *P. aeruginosa* strains revealed a range of sensitivities from resistance to  
154 almost complete eradication. In agreement with previous reports [17,35,36], the two  
155 laboratory strains PAO1 and PA14 had contrasting survival patterns: PAO1 was

156 tolerant, whereas PA14 was sensitive. The strains that were most tolerant to HWB  
157 (PA7, PAO1 and YIK) were fully resistant to complement-mediated killing. The similar  
158 survival profiles between HWB and plasma, and the fact that survival of the  
159 complement-sensitive strains CLJ1, IHMA87, and PA14 was 10-fold lower in plasma  
160 than in whole blood suggest an important role for complement in bacterial clearance  
161 within HWB. Due to its complete resistance to killing, the YIK strain was excluded from  
162 subsequent experiments.

163 To assess how complement contributes to bacterial elimination in HWB, we examined  
164 the survival of the different strains by counting CFUs following incubation in HWB  
165 reconstituted after heat-inactivation of the plasma (see Material and Methods). Heat-  
166 inactivation, which eradicates complement activity, resulted in full survival of all strains,  
167 including the hypersensitive *E. coli* CF7968 (Fig 2B). Indeed, most strains multiplied  
168 when incubated in blood lacking functional complement, as observed by the increased  
169 CFUs compared to the starting population.

170 The antimicrobial activity of complement relies on three main mechanisms: i/ bacterial  
171 lysis due to the insertion of the membrane attack complex (MAC) into the bacterial  
172 envelope [37], ii/ opsonophagocytosis, which combines C3b binding at the pathogen's  
173 surface and its recognition by complement receptors [37], and iii/ formation of  
174 neutrophil extracellular traps (NETs) to trap and kill invading bacteria [38]. To elucidate  
175 which of these mechanisms was involved in bacterial clearance, we treated the blood  
176 with Cytochalasin D to inactivate phagocytosis, or with DNase I to prevent NETs  
177 formation [22,39] and monitored bacterial survival. Following treatment with DNase I,  
178 the same level of bacterial elimination was observed as with untreated HWB (Fig 2C),  
179 indicating that NETs play a negligible role in the process observed here. In contrast,



180 PA7 and PAO1 elimination appear to involve some internalization by phagocytes, as  
181 their survival was consistently increased in Cytochalasin D-treated blood (Fig 2C).  
182 Because the clearance of these two strains was also complement-dependent, we  
183 conclude that they are eliminated through opsonophagocytosis. Blocking phagocytosis  
184 had no impact on the other complement-sensitive strains CLJ1, IHMA87, PA14, and  
185 *E. coli* CF7968, suggesting that they are killed through direct MAC-induced lysis.  
186 Importantly, even though most of the strains were highly sensitive to complement, we  
187 recurrently detected a subpopulation of survivors corresponding to <1% or even  
188 0.002% of the initial inoculum, in HWB and plasma, respectively (Fig 1A and 2A).  
189 These results suggest that a small bacterial subpopulation, that we termed “evaders”,  
190 differ in phenotype from the majority of the population, and display increased tolerance  
191 to complement-mediated killing.

192

### 193 **Complement evaders display persister-like features**

194 As indicated above, only the laboratory strain *E. coli* CF7968 was entirely eliminated  
195 upon exposure to complement. The subpopulation of *P. aeruginosa* evaders in plasma  
196 ranged from 0.1% down to 0.002% of the initial bacterial load, depending on the strain  
197 (Fig 2A). We further investigated this intriguing difference in sensitivities using the three  
198 complement-sensitive strains PA14, CLJ1, and IHMA87, by carefully examining the  
199 kinetics of bactericidal activity in plasma over a 6-h incubation (Fig 3A). A biphasic  
200 curve of bacterial killing was observed, with the majority of the sensitive population (>  
201 99.9%) eliminated within 2 h. Following this first phase, killing slowed down, reached  
202 a plateau and left a minor subpopulation of surviving cells. However, this subpopulation  
203 failed to grow, even after 6 h. We verified that the drop off in killing rate was not due to

204 depletion of complement activity after 2 h by retesting the used plasma. The used  
205 plasma was still sufficiently active to kill  $> 10^7$  *P. aeruginosa* PA14 cells during a 1-h  
206 incubation (Fig S3A). Thus, the plasma had a residual bactericidal capacity, sufficient  
207 to eliminate a population at least 4-log more numerous than the number of evaders.  
208 As further evidence that evaders are not simply a result of bacterial overload of the  
209 complement system, inoculating HWB with 10-fold fewer bacterial cells resulted in the  
210 same proportion of evaders (Fig S3B). Based on these results, evaders correspond to  
211 phenotypic variants displaying complement tolerance, and appear to be present in  
212 similar proportions to antibiotic-tolerant persisters [40,41].

213 To further phenotypically characterize evaders, we re-cultured the survivors recovered  
214 from a first incubation in plasma and challenged their progeny. As shown in Fig 3B,  
215 following re-culture, the bacterial population had a similar sensitivity profile to  
216 previously unchallenged cells. In some cases, the number of evaders in these repeat  
217 challenges was below the limit of detection in our experimental settings (e.g. CLJ1  
218 after 2 h). This apparent paradox is a hallmark of antibiotic persisters [42]. Thus,  
219 neither evaders nor persisters reflect the emergence of resistant mutants, rather the  
220 evader phenotype is transient and reversible.

221 As complement evaders were detected for all sensitive *P. aeruginosa* strains, we  
222 tested whether this behavior could be extended to other Gram-negative bacteria. To  
223 that aim, we selected strains of seven Gram-negative species (Table S1) and  
224 assessed their survival in pooled plasma. Among the strains tested,  
225 *Stenotrophomonas maltophilia* was undetectable after 1 h of incubation, and *Serratia*  
226 *marcescens* presented what we called a tolerant phenotype in plasma, with a slow but  
227 constant elimination rate. In contrast, the five other strains tested – *Acinetobacter*

228 *baumannii*, *Burkholderia multivorans*, enteroaggregative (EA) *E. coli* 17-2, *Klebsiella*  
229 *pneumoniae*, and *Yersinia enterocolitica* – presented a biphasic survival curve similar  
230 to the one recorded for *P. aeruginosa* (Fig 3C). For these strains, the proportion of  
231 evaders withstanding complement-mediated lysis after 3 h of incubation ranged from  
232 1% to 0.0002% of the initial population. When individual evader colonies were re-  
233 cultured, a population as sensitive as the parental one was recovered, as seen for *P.*  
234 *aeruginosa*. Unexpectedly, for *K. pneumoniae*, one evader colony out of the three that  
235 were randomly selected gave rise to a resistant population (Fig 3D). Thus,  
236 complement-resistant mutants can be selected and we do not currently know whether  
237 selection occurs over the course of the pre-challenge culture steps, or during contact  
238 with plasma.

239

#### 240 **Evaders and persisters are distinct subpopulations**

241 To further describe the features of complement evaders, we compared them with  
242 antibiotic-tolerant persisters. Antibiotic persisters can correspond to up to 100% of cells  
243 in the stationary phase of growth, presumably due to growth arrest [43–45]. Thus, after  
244 verifying bacterial growth-rates and states (log versus stationary) (Fig S4), we tested  
245 whether the evaders observed in exponentially growing cultures corresponded to  
246 residual non-growing cells from the previous overnight culture, or to rare cells that had  
247 already entered the stationary state after a few hours of culture. To eliminate possible  
248 artefacts due to the growth phases [42,46], we challenged stationary-phase cells or  
249 exponentially growing cells with plasma. For the three strains *P. aeruginosa* IHMA87,  
250 *A. baumannii* and *Y. enterocolitica*, we observed that the level of evaders was higher  
251 in actively growing cultures, while for the other strains their proportions were similar

252 between the two states (Fig 4A). Therefore, exponentially growing bacteria had a  
253 similar or higher capacity to produce evaders, suggesting that the emergence of  
254 evaders is unrelated to dormancy before complement challenge. To assess whether  
255 metabolic shut-down could increase the proportion of evaders, prior to exposure to  
256 plasma, *P. aeruginosa* IHMA87 was treated with the protonophore cyanide m-  
257 chlorophenylhydrazine (CCCP), which uncouples oxidative phosphorylation.  
258 Exposure to CCCP has been reported to increase the proportion of antibiotic persisters  
259 in *P. aeruginosa* by almost 2-log [47]. The addition of CCCP had no effect on bacterial  
260 survival in LB (Fig S5), but its use before the plasma challenge completely abolished  
261 the detection of evaders from 2 h of incubation (Fig 4B), suggesting that proton-motive  
262 force is necessary for survival. To assess more growth parameters of evaders and the  
263 possibility that they display a “slow growth phenotype”, we performed time-lapse  
264 microscopy of IHMA87-GFP bacteria on agarose pads after incubation in normal or  
265 heat-inactivated plasma (Fig 4C to 4F). Our results show that evaders immediately and  
266 actively grow following plasma removal and spotting on agarose pads, forming  
267 exponentially-growing microcolonies (Fig 4C). In both normal and heat-inactivated  
268 plasma-treated conditions, growth rate was low upon spotting ( $0.6 \pm 0.3 \text{ h}^{-1}$ ) but  
269 stabilized at levels similar to batch cultures ( $1.2 \pm 0.1 \text{ h}^{-1}$ ) after 2.5 h (Fig 4D). Division  
270 was not impaired in evaders as the mean time to reach a first division did not vary  
271 between normal ( $1.08 \pm 0.35 \text{ h}$ ) and heat-inactivated plasma-treated cells ( $0.98 \pm 0.34 \text{ h}$ )  
272 (Fig 4E and 4F). Altogether, these results suggest that survival to plasma treatment is  
273 not dependent on growth rate but requires energy and active metabolism.

274

275

276 **BSI isolates show full range of complement resistance and presence of evaders**

277 As we had demonstrated that the central driver of bacterial clearance from blood was  
278 the complement system, mainly through its direct lytic activity, we next investigated  
279 survival in plasma of a cohort of twelve clinical strains isolated from patients with BSI  
280 (Table S1 and S2) to determine their capacity to form evaders. Like the data obtained  
281 with the initial six selected strains, BSI isolates displayed differences in survival rates  
282 in plasma, of up to five orders of magnitude. Four strains (PaG2, PaG5, PaG6, and  
283 PaG10) were tolerant to complement killing, displaying > 50% survival, with some even  
284 able to multiply in these conditions (PaG2, PaG6 and PaG10) (Fig 5A). In contrast, for  
285 other strains (PaG8, PaG9, PaG14) just < 0.02% of the initial population survived (Fig  
286 5A). The limited number of strains and the high diversity of serotypes identified (Table  
287 S1) would make any attempt to correlate bacterial survival in plasma with strain  
288 serotype too speculative. Even though some strains were highly sensitive to  
289 complement, none were fully eliminated. To verify that these surviving cells  
290 corresponded to complement evaders, we also assessed their survival kinetics in  
291 plasma (Fig. 5B). The three isolates PaG3, 9, and 17 presented a tolerant phenotype,  
292 with a constant rate of elimination, never reaching a plateau even after 4 h incubation.  
293 In contrast, a biphasic killing curve was recorded for the five other isolates, the kinetics  
294 of the curve varied from strain to strain, sometimes reaching a plateau after just 1 h,  
295 whereas for others the death rate started to slow from the 3-h time point. As indicated  
296 above, in some cases, surviving cells were scarce and below the limit of detection  
297 (e.g. PaG8 at 2 and 3 h). Thus, most clinical isolates form evaders which can withstand  
298 complement-mediated lysis, suggesting that this phenomenon could be exploited by  
299 *P. aeruginosa* to persist within the bloodstream in clinical settings.

## 301 **Discussion**

302 Bacteremia caused by the multi-drug resistant opportunistic pathogen *P. aeruginosa*  
303 presents a particular threat to hospitalized patients. To gain more knowledge on host  
304 and pathogen strategies associated with BSI, we undertook an extensive analysis of a  
305 cohort of *P. aeruginosa* strains in an *ex vivo* HWB model of infection. Although many  
306 previous studies have addressed bacterial transmigration across epithelial and  
307 endothelial barriers, the interplay between the immune system and bacterial survival  
308 in HWB has been less extensively documented. We found that the nature of *P.*  
309 *aeruginosa* toxins (ExoS, ExoU or ExlA) was unrelated to a strain's capacity to survive  
310 in HWB, even though these toxins play important roles in breaching epithelial and  
311 endothelial barriers [13,27,31,48,49]. The levels of bacterial survival measured in HWB  
312 were highly variable and directly related to the action of the complement system, as  
313 previously reported for carbapenem-resistant epidemic clones of *Klebsiella*  
314 *pneumoniae* [50]. NETs did not contribute significantly to bacterial killing. In some  
315 cases, PMNs contributed to bacterial elimination through complement-dependent  
316 opsonophagocytosis, but this process was less efficient than direct MAC-induced lysis.  
317 In line with this observation, Thanabalasuriar and colleagues [51] observed that  
318 neutrophils had a limited capacity to phagocytose *P. aeruginosa* in the mouse lung  
319 vasculature, in contrast to PMNs recruited to the organ at the site of infection [52].  
320 Complement resistance is the main driver of survival in the bactericidal environment  
321 that human blood represents. Nevertheless, we observed that to fully resist the  
322 immune system, strains had to display both complement resistance and cytotoxicity  
323 toward immune cells, as documented for the highly virulent YIK strain recently isolated  
324 from a 49-year-old individual with no known immunodeficiency [29].

325 A plethora of previously identified bacterial factors could interfere with the complement  
326 system in the HWB model. Thus, bacteria could alter C3b binding [19,36,51,53–56],  
327 recruit negative complement regulators [18,20,57,58], break down complement  
328 proteins [15,59,60], or stabilize outer membrane integrity [61,62]. Consequently,  
329 bacterial resistance to complement activity appears to be multifactorial and strain-  
330 dependent, and should thus be investigated in a more systematic and uniform way to  
331 obtain a better overall picture of the complex interactions involved. Indeed, a very  
332 recent Tn-Seq approach performed in parallel on four *Klebsiella pneumoniae* strains  
333 revealed a few general, but mainly strain-dependent, factors contributing to  
334 complement-resistance [63].

335 The most prominent result from our study is the evidence that strains highly sensitive  
336 to plasma can nevertheless escape complement's bactericidal activity by forming  
337 phenotypic variants, or evaders. In some instances, complement evaders represent  
338 < 0.01% of the initial population, with survival kinetics reaching a plateau reminiscent  
339 of bacterial persisters following antibiotic challenges [42]. As with antibiotic persisters  
340 [42], we found that complement evaders do not harbor genetic mutations and that they  
341 lose their complement-tolerant phenotype upon elimination of the stress. However,  
342 complement evaders differ from antibiotic persisters through several features. First,  
343 persisters are more numerous in stationary-phase cultures [45], whereas the fraction  
344 of evaders is similar or even higher in exponentially growing cells. Second, we  
345 observed no growth defect/delay of these rare cells following removal of the stress.  
346 CCCP treatment, which decreases ATP production by membrane-bound ATPases as  
347 a result of inhibition of proton motive force was previously shown to increase the  
348 number of persister cells by 2-log upon challenge with ciprofloxacin [47]. Here,  
349 metabolic shut-down with CCCP prior to the plasma challenge abolished the

350 emergence of evaders. This result further evidences that complement evaders are not  
351 in a dormant state, and that they emerge through an energy-dependent process.  
352 Based on these results, we propose that complement evaders share few  
353 characteristics with antibiotic persisters to withstand a stress [40,64–67], however the  
354 mechanisms leading to the development of these characteristics remain a subject of  
355 debate [68].

356 Interestingly, following serum challenge of uropathogenic *E. coli*, Putrinš and  
357 colleagues [69] reported the emergence of complement-resistant stationary-phase  
358 persisters. This result suggests that, in addition to complement evaders, bacteria may  
359 have developed a number of ways to transiently hide from the immune system when  
360 present in the blood. Putrinš and colleagues also identified a subpopulation of non-  
361 quiescent cells undergoing rapid division in serum, which could withstand complement-  
362 mediated lysis but was sensitive to antibiotics. This population may be the same as  
363 the evaders described here. However, Putrinš and colleagues only observed these  
364 cells from stationary-phase cultures, as exponentially growing bacteria appeared to be  
365 serum-resistant in their experiments.

366 Host immunity can amplify a pathogen's phenotypic heterogeneity, promoting the  
367 formation of antibiotic persisters both *in vivo* and *in vitro*. For example, upon lung  
368 infection with *M. tuberculosis*, cell-to-cell variations in ribosomal RNA transcription  
369 patterns increased markedly compared to growth-permissive *in vitro* conditions [70].  
370 Bacterial uptake by macrophages was also recently shown to induce persistence in  
371 both *Salmonella enterica* and *S. aureus*, in response to the stress conditions  
372 encountered during vacuolar internalization [71–73]. Exposure to human serum has  
373 also been linked to an increased frequency of antibiotic persisters in *Vibrio vulnificus*



374 [74]. The process involved in the emergence of this population is at least partly  
375 mediated by complement activity, as a lower proportion of surviving cells was detected  
376 following exposure to heat-inactivated serum. Our results show that human plasma  
377 can trigger phenotypic diversity in addition to antibiotic persistence, although we still  
378 lack information on whether the evader phenotype emerges spontaneously (are these  
379 cells already present in the population prior to the stress?) or in response to a trigger  
380 (do they only appear upon contact with complement?) [46]. This minor population of  
381 evaders has been ignored so far as it can represent less than 0.01% of the initial  
382 population, and because bacterial survival in serum is often monitored at a single time  
383 point (usually after a 1-h challenge), rather than examining the kinetics of survival over  
384 a long enough period to reach a plateau.

385 Although BSIs were historically considered “dead-ends” for infectious agents, Bachta  
386 and colleagues [23] recently reported that once in the blood, a subpopulation of *P.*  
387 *aeruginosa* migrates to the gallbladder in mice, where it replicates and can exit the  
388 organism through the intestinal tract, causing contamination of cage-mates. In our  
389 experiments, not all BSI isolates were complement-tolerant, but most of the sensitive  
390 strains could form evaders, making the bacteria potentially transmittable.

391 Numerous bacterial pathogens affecting humans may form an evader population,  
392 which could represent a reservoir of complement-resistant cells capable of  
393 disseminating and spreading throughout the organism. By elucidating the molecular  
394 mechanisms through which complement evaders emerge, notably by performing  
395 transcriptomic/proteomic profiling of these populations, we hope to identify ways to  
396 diminish the risks of bacteremia caused by various bacterial pathogens.

397

## 398 **Methods**

### 399 **Bacterial strains and culture conditions**

400 The bacterial strains used in this study are listed in Table S1. Bacteria were grown in  
401 liquid Lysogeny Broth (LB) prepared according to Miller's formulation (0.5% yeast  
402 extract, 1% tryptone, 1% NaCl) for >16 h with agitation (300 rpm) at 37 °C, except for  
403 *Y. enterocolitica*, which was cultured at 28 °C. If not otherwise specified, the culture  
404 was diluted and placed at 300 rpm until the OD<sub>600nm</sub> reached ~ 1.

### 405 **Whole blood and plasma killing assays**

406 Heparinized HWB from healthy donors was provided by the French National blood  
407 service (EFS, Grenoble, France) and was used within 3 h of collection. Bacteria  
408 resuspended in RPMI (Thermo Fisher Scientific, Illkirch, France) were incubated in  
409 HWB (90% final blood concentration) at a theoretical multiplicity of infection (MOI) of 5  
410 per phagocyte (monocytes and granulocytes), which corresponded to a final bacterial  
411 concentration of  $2.25 \times 10^7$  mL<sup>-1</sup>. The precise value was verified for each experiment by  
412 plating the bacteria on LB agar plates at  $t_0$  and counting colony-forming units (CFU)  
413 after ~ 15 h incubation at 37 °C. Tubes were incubated for 3 h on a rotating wheel at  
414 37 °C in a 5% CO<sub>2</sub> atmosphere. Following incubation, bacterial survival was  
415 determined following serial dilutions in H<sub>2</sub>O by colony counting on LB or selective PIA  
416 (*Pseudomonas* Isolation Agar) medium. Bacterial survival was expressed as a  
417 percentage (%) of survivors calculated from the CFU number after 3 h ( $t_{3h}$ ) incubation  
418 relative to the CFU measured in the initial inoculum ( $t_0$ ). To inhibit the potential  
419 bactericidal effect of phagocytosis and Neutrophil Extracellular Traps (NETs),  
420 Cytochalasin D (10 μM) and DNase I (200 U/mL) (Sigma-Aldrich, Saint-Quentin-  
421 Fallavier, France) were applied to the HWB for 30 min at 37 °C prior to the addition of

422 bacteria. In the non-treated condition, RPMI medium without inhibitors was added to  
423 the blood.

424 To inactivate complement, HWB was centrifuged for 5 min at 400 g to isolate plasma,  
425 which was subsequently heat-inactivated for 30 min at 56 °C. Meanwhile, cells were  
426 washed twice with RPMI and pelleted by centrifugation for 5 min at 400 g.  
427 Complement-inactivated whole blood was reconstituted by mixing the heat-inactivated  
428 plasma with the washed cells. A control condition was also prepared, combining  
429 washed cells with untreated plasma.

430 For plasma killing assays, heparinized HWB was centrifuged for 10 min at 1000 g. The  
431 supernatant was recovered and filtered through a 0.2- $\mu$ m membrane prior to storage  
432 at -80 °C until needed. Pools of plasma used in experiments were from ten individual  
433 donors. After thawing, plasma was systematically filtered once again through a 0.2- $\mu$ m  
434 membrane. Bacteria in PBS supplemented with calcium and magnesium (Thermo  
435 Fisher Scientific, Illkirch, France) were incubated in plasma (90% final plasma  
436 concentration) at the same concentration as that used for whole blood assays  
437 ( $2.25 \times 10^7$  CFU/mL). At various time points (see figures), survival was determined by  
438 counting colonies on LB or PIA, following serial dilutions in PBS supplemented with  
439 calcium and magnesium. As for the HWB assays, the CFU count for the starting  
440 inoculum was taken as reference (100% survival) to quantify bacterial killing.

#### 441 **Cyanide m-chlorophenylhydrazone treatment before plasma challenge**

442 CCCP (Sigma-Aldrich, Saint-Quentin-Fallavier, France) solubilized in dimethyl  
443 sulfoxide (DMSO) was added to the LB culture once an  $OD_{600nm} \sim 1$  was reached. The  
444 final CCCP and DMSO concentrations were 200  $\mu$ g/mL and 0.5%, respectively.  
445 Following 1 h incubation at 37 °C with agitation (300 rpm), bacteria were recovered by

446 centrifugation for 5 min at 5,000 g. The bacterial pellet was resuspended in PBS  
447 supplemented with calcium and magnesium.

#### 448 **Cytokine quantification in whole blood**

449 Cytokine concentrations in whole blood were assessed by flow cytometry. Briefly,  
450 bacteria suspended in RPMI were added to HWB ( $2.25 \times 10^7$  CFU/mL) and incubated  
451 for 3 or 6 h. Plasma was recovered following a 5-min centrifugation step at 400 g and  
452 stored at  $-80^\circ\text{C}$  until required. Analytes were quantified using the LEGENDplex  
453 Human Inflammation Panel 1 (Biolegend, San Diego, USA) according to the supplier's  
454 instructions, and samples were analyzed on a FACSCalibur (Becton Dickinson, Pont  
455 de Claix, France). For the non-infected control (NI), RPMI was added to the blood.

#### 456 **Bacterial cytotoxicity in whole blood**

457 Heparinized whole blood from healthy donors (100  $\mu\text{L}$ ) was infected with bacteria in  
458 the same conditions described for the killing assays (MOI 5). After incubation for 3 h  
459 at  $37^\circ\text{C}$  on a rotating wheel, CD45VioBright 667 antibody from Miltenyi Biotec  
460 (Bergisch Gladbach, Germany) was added. Samples were incubated for 20 min at  
461 room temperature, and then diluted 10x with RPMI medium without phenol red but  
462 containing penicillin and streptomycin. Flow cytometry was performed on a  
463 FACSCalibur, and data were analyzed using FCS Express software (DeNovo  
464 software). Leucocytes were first defined based on CD45<sup>+</sup> expression to exclude red  
465 blood cells. Lymphocyte/Monocyte and Neutrophil gates were then defined according  
466 to size and granulometry of events, and quantified. The percentage of  
467 lymphocytes/monocytes and neutrophils was determined for each infection condition,  
468 and compared to uninfected conditions.

#### 469 **Time-lapse microscopy to assess the regrowth of complement-resilient bacteria**

470 After incubation in normal plasma (or in heat-inactivated plasma for the control  
471 condition), bacteria were collected by centrifugation for 5 min at 5,000 g, washed and  
472 resuspended in PBS and then spotted on a 2% agarose pad containing LB. After  
473 complete absorption of the liquid into the pad, the preparation was sealed under a  
474 0.17-mm glass coverslip using an adhesive plastic frame (Gene Frame 125  $\mu$ L,  
475 Thermo Fisher Scientific, Illkirch, France). Time-lapse microscopy was performed at  
476 37 °C using a 100x oil immersion objective on an inverted microscope (Axio Observer  
477 Z1, Zeiss, Germany). Phase-contrast and fluorescent images were recorded every  
478 15 min with a Hamamatsu ORCA-Flash 4.0 digital camera and a Zeiss 38HE filterset.  
479 In each experiment performed (two for normal and two for heat-inactivated plasma),  
480 eight isolated microcolonies were segmented using MicrobeJ (27572972) to determine  
481 their surface, growth rate and time of first division.

#### 482 **Serotyping of BSI isolates**

483 The twelve clinical isolates were serotyped using 16 monovalent antisera directed  
484 against *P. aeruginosa* LPS (Bio-Rad, Marnes-la-Coquettes, France), according to the  
485 manufacturer's instructions.

#### 486 **Statistical analysis**

487 Statistical tests were performed using SigmaPlot software. To analyze multiple  
488 comparisons, a one-way ANOVA or Kruskal-Wallis test were applied, depending on  
489 the normality of the data. A Student-Newman-Keuls pairwise comparison was then  
490 performed. Mann-Whitney U test or Student's t-test were used to compare two groups,  
491 depending of the normality of the data. Where indicated, values were log-transformed  
492 to convert initially non-normally-distributed data into a normally-distributed dataset.  
493 GraphPad Prism was used to create graphs.

494 **Ethics statement**

495 Medical data from patients infected with *P. aeruginosa* strains were extracted from  
496 medical records. No nominative or sensitive personal data were recorded, and the  
497 study only involved the reuse of already available data. This study falls within the scope  
498 of the French Reference Methodology MR-004 for studies not involving human  
499 subjects.

500

501 **Data Availability Statement**

502 All relevant information are provided in the article and the supporting information  
503 files.

504

505 **Funding**

506 This work was supported by grants from the French National Agency for Research  
507 (ANR-15-CE11-0018-01), the Laboratory of Excellence GRAL, funded through the  
508 University Grenoble Alpes graduate school (Ecoles Universitaires de Recherche)  
509 CBH-EUR-GS (ANR-17-EURE-0003), and the Fondation pour la Recherche Médicale  
510 (Team FRM 2017, DEQ20170336705) to I.A. S.P. was awarded a Ph.D. fellowship  
511 from the French Ministry of Education and Research, and acknowledges the European  
512 Molecular Biology Organization for the short-term fellowship enabling 2-month stay in  
513 L. van Melderens's laboratory allowing further characterization of the evader population.  
514 Institutional funding support from CNRS, INSERM, CEA, and Grenoble Alpes  
515 University is also acknowledged. The funders had no role in study design, data  
516 collection or analysis, decision to publish, or preparation of the manuscript.

## 517 **Acknowledgements**

518 We thank Thomas Hindré (University Grenoble Alpes, France), Pierre Marcoux (LETI,  
519 CEA Grenoble, France) and Eric Cascales (CNRS, Aix-Marseille Université, France)  
520 for gift of *E. coli* CF7968, *K. pneumoniae* NCTC96 and enteroaggregative *E. coli* 17-2,  
521 respectively. *P. aeruginosa* strain IHMA879472 was kindly provided by International  
522 Health Management Association (IHMA; USA). We are grateful to Peter Panchev for  
523 English editing of the initial manuscript, and to Maighread Gallagher-Gambarelli (TWS  
524 Editing) for suggestions on language usage for the final manuscript.

525

## 526 **Conflict of interest**

527 All authors declare no competing interests.

528

## 529 **References**

- 530 [1] Kern WV, Rieg S. Burden of bacterial bloodstream infection—a brief update on  
531 epidemiology and significance of multidrug-resistant pathogens. *Clin Microbiol Infect*  
532 2020;26:151–7. <https://doi.org/10.1016/j.cmi.2019.10.031>.
- 533 [2] Kang C, Kim S, Kim H, Park S, Choe Y, Oh M, et al. *Pseudomonas aeruginosa*  
534 Bacteremia: Risk Factors for Mortality and Influence of Delayed Receipt of Effective  
535 Antimicrobial Therapy on Clinical Outcome. *Clin Infect Dis* 2003;37:745–51.  
536 <https://doi.org/10.1086/377200>.
- 537 [3] Vincent J-L, Rello J, Marshall J, Silva E, Anzueto A, Martin CD, et al.  
538 International study of the prevalence and outcomes of infection in intensive care units.  
539 *JAMA* 2009;302:2323–9. <https://doi.org/10.1001/jama.2009.1754>.
- 540 [4] Wójkowska-Mach, Chmielarczyk, Strus, Lauterbach, Heczko. Neonate  
541 Bloodstream Infections in Organization for Economic Cooperation and Development  
542 Countries: An Update on Epidemiology and Prevention. *J Clin Med* 2019;8:1750.  
543 <https://doi.org/10.3390/jcm8101750>.
- 544 [5] Leibovici-Weissman Y, Tau N, Yahav D. Bloodstream infections in the elderly:  
545 what is the real goal? *Aging Clin Exp Res* 2019;In press.  
546 <https://doi.org/10.1007/s40520-019-01337-w>.

- 547 [6] Kaye KS, Marchaim D, Chen T-Y, Baures T, Anderson DJ, Choi Y, et al. Effect  
548 of Nosocomial Bloodstream Infections on Mortality, Length of Stay, and Hospital Costs  
549 in Older Adults. *J Am Geriatr Soc* 2014;62:306–11. <https://doi.org/10.1111/jgs.12634>.
- 550 [7] Hattemer A, Hauser A, Diaz M, Scheetz M, Shah N, Allen JP, et al. Bacterial  
551 and Clinical Characteristics of Health Care- and Community-Acquired Bloodstream  
552 Infections Due to *Pseudomonas aeruginosa*. *Antimicrob Agents Chemother*  
553 2013;57:3969–75. <https://doi.org/10.1128/AAC.02467-12>.
- 554 [8] Guillet CV, Vazquez R, Noe J, Micek ST, Kollef MH. A cohort study of  
555 bacteremic pneumonia: The importance of antibiotic resistance and appropriate initial  
556 therapy? *Medicine (Baltimore)* 2016;95:e4708.  
557 <https://doi.org/10.1097/MD.0000000000004708>.
- 558 [9] Thaden JT, Park LP, Maskarinec SA, Ruffin F, Fowler VG, van Duin D. Results  
559 from a 13-Year Prospective Cohort Study Show Increased Mortality Associated with  
560 Bloodstream Infections Caused by *Pseudomonas aeruginosa* Compared to Other  
561 Bacteria. *Antimicrob Agents Chemother* 2017;61. <https://doi.org/10.1128/AAC.02671-16>.
- 563 [10] Crone S, Vives-Flórez M, Kvich L, Saunders AM, Malone M, Nicolaisen MH, et  
564 al. The environmental occurrence of *Pseudomonas aeruginosa*. *APMIS Acta Pathol*  
565 *Microbiol Immunol Scand* 2020;128:220–31. <https://doi.org/10.1111/apm.13010>.
- 566 [11] Williams BJ, Dehnbostel J, Blackwell TS. *Pseudomonas aeruginosa*: Host  
567 defence in lung diseases: *P. aeruginosa*: host defence in the lung. *Respirology*  
568 2010;15:1037–56. <https://doi.org/10.1111/j.1440-1843.2010.01819.x>.
- 569 [12] Tacconelli E, Carrara E, Savoldi A, Harbarth S, Mendelson M, Monnet DL, et al.  
570 Discovery, research, and development of new antibiotics: the WHO priority list of  
571 antibiotic-resistant bacteria and tuberculosis. *Lancet Infect Dis* 2018;18:318–27.  
572 [https://doi.org/10.1016/S1473-3099\(17\)30753-3](https://doi.org/10.1016/S1473-3099(17)30753-3).
- 573 [13] Rangel SM, Diaz MH, Knoten CA, Zhang A, Hauser AR. The Role of ExoS in  
574 Dissemination of *Pseudomonas aeruginosa* during Pneumonia. *PLoS Pathog*  
575 2015;11:e1004945. <https://doi.org/10.1371/journal.ppat.1004945>.
- 576 [14] Golovkine G, Faudry E, Bouillot S, Elsen S, Attrée I, Huber P. *Pseudomonas*  
577 *aeruginosa* Transmigrates at Epithelial Cell-Cell Junctions, Exploiting Sites of Cell  
578 Division and Senescent Cell Extrusion. *PLoS Pathog* 2016;12:e1005377.  
579 <https://doi.org/10.1371/journal.ppat.1005377>.
- 580 [15] Hong Y, Ghebrehiwet B. Effect of *Pseudomonas aeruginosa* elastase and  
581 alkaline protease on serum complement and isolated components C1q and C3. *Clin*  
582 *Immunol Immunopathol* 1992;62:133–8. [https://doi.org/10.1016/0090-1229\(92\)90065-V](https://doi.org/10.1016/0090-1229(92)90065-V).
- 584 [16] Dacheux D, Attrée I, Schneider C, Toussaint B. Cell death of human  
585 polymorphonuclear neutrophils induced by a *Pseudomonas aeruginosa* cystic fibrosis  
586 isolate requires a functional type III secretion system. *Infect Immun* 1999;67:6164–7.
- 587 [17] Priebe GP, Dean CR, Zaidi T, Meluleni GJ, Coleman FT, Coutinho YS, et al.  
588 The galU Gene of *Pseudomonas aeruginosa* Is Required for Corneal Infection and  
589 Efficient Systemic Spread following Pneumonia but Not for Infection Confined to the



- 590 Lung. Infect Immun 2004;72:4224–32. <https://doi.org/10.1128/IAI.72.7.4224->  
591 4232.2004.
- 592 [18] Kunert A, Losse J, Gruszin C, Hühn M, Kaendler K, Mikkat S, et al. Immune  
593 Evasion of the Human Pathogen *Pseudomonas aeruginosa*: Elongation Factor Tuf Is  
594 a Factor H and Plasminogen Binding Protein. J Immunol 2007;179:2979–88.  
595 <https://doi.org/10.4049/jimmunol.179.5.2979>.
- 596 [19] Mishra M, Byrd MS, Sergeant S, Azad AK, Parsek MR, McPhail L, et al.  
597 *Pseudomonas aeruginosa* Psl polysaccharide reduces neutrophil phagocytosis and  
598 the oxidative response by limiting complement-mediated opsonization: Psl and the  
599 innate immune response towards *P. aeruginosa*. Cell Microbiol 2012;14:95–106.  
600 <https://doi.org/10.1111/j.1462-5822.2011.01704.x>.
- 601 [20] Hallström T, Uhde M, Singh B, Skerka C, Riesbeck K, Zipfel PF. *Pseudomonas*  
602 *aeruginosa* Uses Dihydrolipoamide Dehydrogenase (Lpd) to Bind to the Human  
603 Terminal Pathway Regulators Vitronectin and Clusterin to Inhibit Terminal Pathway  
604 Complement Attack. PLOS ONE 2015;10:e0137630.  
605 <https://doi.org/10.1371/journal.pone.0137630>.
- 606 [21] Brodin P, Davis MM. Human immune system variation. Nat Rev Immunol  
607 2017;17:21–9. <https://doi.org/10.1038/nri.2016.125>.
- 608 [22] van der Maten E, de Jonge MI, de Groot R, van der Flier M, Langereis JD. A  
609 versatile assay to determine bacterial and host factors contributing to  
610 opsonophagocytotic killing in hirudin-anticoagulated whole blood. Sci Rep  
611 2017;7:42137. <https://doi.org/10.1038/srep42137>.
- 612 [23] Bachtá KER, Allen JP, Cheung BH, Chiu C-H, Hauser AR. Systemic infection  
613 facilitates transmission of *Pseudomonas aeruginosa* in mice. Nat Commun  
614 2020;11:543. <https://doi.org/10.1038/s41467-020-14363-4>.
- 615 [24] Holloway BW. Genetic Recombination in *Pseudomonas aeruginosa*.  
616 Microbiology 1955;13:572–81. <https://doi.org/10.1099/00221287-13-3-572>.
- 617 [25] Rahme L, Stevens E, Wolfort S, Shao J, Tompkins R, Ausubel F. Common  
618 virulence factors for bacterial pathogenicity in plants and animals. Science  
619 1995;268:1899–902. <https://doi.org/10.1126/science.7604262>.
- 620 [26] Roy PH, Tetu SG, Larouche A, Elbourne L, Tremblay S, Ren Q, et al. Complete  
621 genome sequence of the multiresistant taxonomic outlier *Pseudomonas aeruginosa*  
622 PA7. PloS One 2010;5:e8842. <https://doi.org/10.1371/journal.pone.0008842>.
- 623 [27] Elsen S, Huber P, Bouillot S, Couté Y, Fournier P, Dubois Y, et al. A Type III  
624 Secretion Negative Clinical Strain of *Pseudomonas aeruginosa* Employs a Two-  
625 Partner Secreted Exolysin to Induce Hemorrhagic Pneumonia. Cell Host Microbe  
626 2014;15:164–76. <https://doi.org/10.1016/j.chom.2014.01.003>.
- 627 [28] Kos VN, Déraspe M, McLaughlin RE, Whiteaker JD, Roy PH, Alm RA, et al. The  
628 Resistome of *Pseudomonas aeruginosa* in Relationship to Phenotypic Susceptibility.  
629 Antimicrob Agents Chemother 2015;59:427–36. <https://doi.org/10.1128/AAC.03954->  
630 14.
- 631 [29] Elabbadi A, Pont S, Verdet C, Plésiat P, Cretin F, Voiriot G, et al. An unusual  
632 community-acquired invasive and multi systemic infection due to ExoU-harboring

- 633 Pseudomonas aeruginosa strain: Clinical disease and microbiological characteristics.  
634 J Microbiol Immunol Infect 2019;In press. <https://doi.org/10.1016/j.jmii.2019.06.008>.
- 635 [30] Hirsch M, Elliott T. Role of ppGpp in rpoS Stationary-Phase Regulation in  
636 Escherichia coli. J Bacteriol 2002;184:5077–87.  
637 <https://doi.org/10.1128/JB.184.18.5077-5087.2002>.
- 638 [31] Hauser AR, Engel JN. Pseudomonas aeruginosa induces type-III-secretion-  
639 mediated apoptosis of macrophages and epithelial cells. Infect Immun 1999;67:5530–  
640 7.
- 641 [32] Diaz MH, Hauser AR. Pseudomonas aeruginosa cytotoxin ExoU is injected into  
642 phagocytic cells during acute pneumonia. Infect Immun 2010;78:1447–56.  
643 <https://doi.org/10.1128/IAI.01134-09>.
- 644 [33] Rangel SM, Logan LK, Hauser AR. The ADP-ribosyltransferase domain of the  
645 effector protein ExoS inhibits phagocytosis of Pseudomonas aeruginosa during  
646 pneumonia. MBio 2014;5:e01080-01014. <https://doi.org/10.1128/mBio.01080-14>.
- 647 [34] Reboud E, Elsen S, Bouillot S, Golovkine G, Basso P, Jeannot K, et al.  
648 Phenotype and toxicity of the recently discovered exlA-positive Pseudomonas  
649 aeruginosa strains collected worldwide: Virulence of exlA+ strains. Environ Microbiol  
650 2016;18:3425–39. <https://doi.org/10.1111/1462-2920.13262>.
- 651 [35] Skurnik D, Roux D, Cattoir V, Danilchanka O, Lu X, Yoder-Himes DR, et al.  
652 Enhanced in vivo fitness of carbapenem-resistant oprD mutants of Pseudomonas  
653 aeruginosa revealed through high-throughput sequencing. Proc Natl Acad Sci  
654 2013;110:20747–52. <https://doi.org/10.1073/pnas.1221552110>.
- 655 [36] Martínez-Ramos I, Mulet X, Moyá B, Barbier M, Oliver A, Albertí S.  
656 Overexpression of MexCD-OprJ Reduces Pseudomonas aeruginosa Virulence by  
657 Increasing Its Susceptibility to Complement-Mediated Killing. Antimicrob Agents  
658 Chemother 2014;58:2426–9. <https://doi.org/10.1128/AAC.02012-13>.
- 659 [37] Heesterbeek DAC, Angelier ML, Harrison RA, Rooijackers SHM. Complement  
660 and Bacterial Infections: From Molecular Mechanisms to Therapeutic Applications. J  
661 Innate Immun 2018;10:455–64. <https://doi.org/10.1159/000491439>.
- 662 [38] de Bont CM, Boelens WC, Puijn GJM. NETosis, complement, and coagulation:  
663 a triangular relationship. Cell Mol Immunol 2019;16:19–27.  
664 <https://doi.org/10.1038/s41423-018-0024-0>.
- 665 [39] Brinkmann V, Reichard U, Fauler B, Uhlemann Y, Weiss DS, Weinrauch Y, et  
666 al. Neutrophil Extracellular Traps Kill Bacteria. Science 2004;303:1532–5.  
667 <https://doi.org/10.1126/science.1092385>.
- 668 [40] Balaban NQ, Merrin J, Chait R, Kowalik L, Leibler S. Bacterial persistence as a  
669 phenotypic switch. Science 2004;305:1622–5.  
670 <https://doi.org/10.1126/science.1099390>.
- 671 [41] Fisher RA, Gollan B, Helaine S. Persistent bacterial infections and persister  
672 cells. Nat Rev Microbiol 2017;15:453–64. <https://doi.org/10.1038/nrmicro.2017.42>.
- 673 [42] Balaban NQ, Helaine S, Lewis K, Ackermann M, Aldridge B, Andersson DI, et  
674 al. Definitions and guidelines for research on antibiotic persistence. Nat Rev Microbiol

- 675 2019;17:441–8. <https://doi.org/10.1038/s41579-019-0196-3>.
- 676 [43] Spoering AL, Lewis K. Biofilms and Planktonic Cells of *Pseudomonas*  
677 *aeruginosa* Have Similar Resistance to Killing by Antimicrobials. *J Bacteriol*  
678 2001;183:6746–51. <https://doi.org/10.1128/JB.183.23.6746-6751.2001>.
- 679 [44] Keren I, Kaldalu N, Spoering A, Wang Y, Lewis K. Persister cells and tolerance  
680 to antimicrobials. *FEMS Microbiol Lett* 2004;230:13–8. <https://doi.org/10.1016/S0378->  
681 1097(03)00856-5.
- 682 [45] Conlon BP, Rowe SE, Gandt AB, Nuxoll AS, Donegan NP, Zalis EA, et al.  
683 Persister formation in *Staphylococcus aureus* is associated with ATP depletion. *Nat*  
684 *Microbiol* 2016;1:16051. <https://doi.org/10.1038/nmicrobiol.2016.51>.
- 685 [46] Brauner A, Fridman O, Gefen O, Balaban NQ. Distinguishing between  
686 resistance, tolerance and persistence to antibiotic treatment. *Nat Rev Microbiol*  
687 2016;14:320–30. <https://doi.org/10.1038/nrmicro.2016.34>.
- 688 [47] Grassi L, Di Luca M, Maisetta G, Rinaldi AC, Esin S, Trampuz A, et al.  
689 Generation of Persister Cells of *Pseudomonas aeruginosa* and *Staphylococcus aureus*  
690 by Chemical Treatment and Evaluation of Their Susceptibility to Membrane-Targeting  
691 Agents. *Front Microbiol* 2017;8:1917. <https://doi.org/10.3389/fmicb.2017.01917>.
- 692 [48] Lee VT, Smith RS, Tumbler B, Lory S. Activities of *Pseudomonas aeruginosa*  
693 Effectors Secreted by the Type III Secretion System In Vitro and during Infection. *Infect*  
694 *Immun* 2005;73:1695–705. <https://doi.org/10.1128/IAI.73.3.1695-1705.2005>.
- 695 [49] Bouillot S, Munro P, Gallet B, Reboud E, Cretin F, Golovkine G, et al.  
696 *Pseudomonas aeruginosa* Exolysin promotes bacterial growth in lungs, alveolar  
697 damage and bacterial dissemination. *Sci Rep* 2017;7:2120.  
698 <https://doi.org/10.1038/s41598-017-02349-0>.
- 699 [50] DeLeo FR, Kobayashi SD, Porter AR, Freedman B, Dorward DW, Chen L, et al.  
700 Survival of Carbapenem-Resistant *Klebsiella pneumoniae* Sequence Type 258 in  
701 Human Blood. *Antimicrob Agents Chemother* 2017;61.  
702 <https://doi.org/10.1128/AAC.02533-16>.
- 703 [51] Thanabalasuriar A, Surewaard BGJ, Willson ME, Neupane AS, Stover CK,  
704 Warrener P, et al. Bispecific antibody targets multiple *Pseudomonas aeruginosa*  
705 evasion mechanisms in the lung vasculature. *J Clin Invest* 2017;127:2249–61.  
706 <https://doi.org/10.1172/JCI89652>.
- 707 [52] Koh AY, Priebe GP, Ray C, Van Rooijen N, Pier GB. Inescapable Need for  
708 Neutrophils as Mediators of Cellular Innate Immunity to Acute *Pseudomonas*  
709 *aeruginosa* Pneumonia. *Infect Immun* 2009;77:5300–10.  
710 <https://doi.org/10.1128/IAI.00501-09>.
- 711 [53] Qadi M, Izquierdo-Rabassa S, Mateu Borrás M, Doménech-Sánchez A, Juan  
712 C, Goldberg JB, et al. Sensing Mg<sup>2+</sup> contributes to the resistance of *Pseudomonas*  
713 *aeruginosa* to complement-mediated opsonophagocytosis: Mg<sup>2+</sup>-dependent  
714 opsonophagocytosis. *Environ Microbiol* 2017;19:4278–86.  
715 <https://doi.org/10.1111/1462-2920.13889>.
- 716 [54] Pier G. *Pseudomonas aeruginosa* lipopolysaccharide: A major virulence factor,  
717 initiator of inflammation and target for effective immunity. *Int J Med Microbiol*

- 718 2007;297:277–95. <https://doi.org/10.1016/j.ijmm.2007.03.012>.
- 719 [55] Mishra M, Ressler A, Schlesinger LS, Wozniak DJ. Identification of OprF as a  
720 complement component C3 binding acceptor molecule on the surface of  
721 *Pseudomonas aeruginosa*. *Infect Immun* 2015;83:3006–14.  
722 <https://doi.org/10.1128/IAI.00081-15>.
- 723 [56] Jones CJ, Wozniak DJ. Psl Produced by Mucoid *Pseudomonas aeruginosa*  
724 Contributes to the Establishment of Biofilms and Immune Evasion. *MBio* 2017;8.  
725 <https://doi.org/10.1128/mBio.00864-17>.
- 726 [57] Hallström T, Mörgelin M, Barthel D, Raguse M, Kunert A, Hoffmann R, et al.  
727 Dihydrolipoamide Dehydrogenase of *Pseudomonas aeruginosa* Is a Surface-Exposed  
728 Immune Evasion Protein That Binds Three Members of the Factor H Family and  
729 Plasminogen. *J Immunol* 2012;189:4939–50.  
730 <https://doi.org/10.4049/jimmunol.1200386>.
- 731 [58] Paulsson M, Singh B, Al-Jubair T, Su Y-C, Høiby N, Riesbeck K. Identification  
732 of outer membrane Porin D as a vitronectin-binding factor in cystic fibrosis clinical  
733 isolates of *Pseudomonas aeruginosa*. *J Cyst Fibros* 2015;14:600–7.  
734 <https://doi.org/10.1016/j.jcf.2015.05.005>.
- 735 [59] Laarman AJ, Bardoel BW, Ruyken M, Fernie J, Milder FJ, van Strijp JAG, et al.  
736 *Pseudomonas aeruginosa* Alkaline Protease Blocks Complement Activation via the  
737 Classical and Lectin Pathways. *J Immunol* 2012;188:386–93.  
738 <https://doi.org/10.4049/jimmunol.1102162>.
- 739 [60] Bastaert F, Kheir S, Saint-Criq V, Villeret B, Dang PM-C, El-Benna J, et al.  
740 *Pseudomonas aeruginosa* LasB Subverts Alveolar Macrophage Activity by Interfering  
741 With Bacterial Killing Through Downregulation of Innate Immune Defense, Reactive  
742 Oxygen Species Generation, and Complement Activation. *Front Immunol*  
743 2018;9:1675. <https://doi.org/10.3389/fimmu.2018.01675>.
- 744 [61] Munguia J, LaRock DL, Tsunemoto H, Olson J, Cornax I, Pogliano J, et al. The  
745 Mla pathway is critical for *Pseudomonas aeruginosa* resistance to outer membrane  
746 permeabilization and host innate immune clearance. *J Mol Med Berl Ger*  
747 2017;95:1127–36. <https://doi.org/10.1007/s00109-017-1579-4>.
- 748 [62] Sanchez-Larrayoz AF, Elhosseiny NM, Chevrette MG, Fu Y, Giunta P,  
749 Spallanzani RG, et al. Complexity of Complement Resistance Factors Expressed by  
750 *Acinetobacter baumannii* Needed for Survival in Human Serum. *J Immunol Baltim Md*  
751 1950 2017;199:2803–14. <https://doi.org/10.4049/jimmunol.1700877>.
- 752 [63] Short FL, Di Sario G, Reichmann NT, Kleanthous C, Parkhill J, Taylor PW.  
753 Genomic profiling reveals distinct routes to complement resistance in *Klebsiella*  
754 *pneumoniae*. *Infect Immun* 2020. <https://doi.org/10.1128/IAI.00043-20>.
- 755 [64] Tuomanen E, Cozens R, Tosch W, Zak O, Tomasz A. The rate of killing of  
756 *Escherichia coli* by beta-lactam antibiotics is strictly proportional to the rate of bacterial  
757 growth. *J Gen Microbiol* 1986;132:1297–304. <https://doi.org/10.1099/00221287-132-5-1297>.
- 759 [65] Lewis K. Persister cells and the riddle of biofilm survival. *Biochem Biokhimiia*  
760 2005;70:267–74. <https://doi.org/10.1007/s10541-005-0111-6>.

- 761 [66] Dhar N, McKinney JD. Microbial phenotypic heterogeneity and antibiotic  
762 tolerance. *Curr Opin Microbiol* 2007;10:30–8.  
763 <https://doi.org/10.1016/j.mib.2006.12.007>.
- 764 [67] Pontes MH, Groisman EA. Slow growth determines nonheritable antibiotic  
765 resistance in *Salmonella enterica*. *Sci Signal* 2019;12.  
766 <https://doi.org/10.1126/scisignal.aax3938>.
- 767 [68] Goormaghtigh F, Van Melderen L. Single-cell imaging and characterization of  
768 *Escherichia coli* persister cells to ofloxacin in exponential cultures. *Sci Adv*  
769 2019;5:eaav9462. <https://doi.org/10.1126/sciadv.aav9462>.
- 770 [69] Putrinš M, Kogermann K, Lukk E, Lippus M, Varik V, Tenson T. Phenotypic  
771 heterogeneity enables uropathogenic *Escherichia coli* to evade killing by antibiotics  
772 and serum complement. *Infect Immun* 2015;83:1056–67.  
773 <https://doi.org/10.1128/IAI.02725-14>.
- 774 [70] Manina G, Dhar N, McKinney JD. Stress and host immunity amplify  
775 *Mycobacterium tuberculosis* phenotypic heterogeneity and induce nongrowing  
776 metabolically active forms. *Cell Host Microbe* 2015;17:32–46.  
777 <https://doi.org/10.1016/j.chom.2014.11.016>.
- 778 [71] Helaine S, Cheverton AM, Watson KG, Faure LM, Matthews SA, Holden DW.  
779 Internalization of *Salmonella* by macrophages induces formation of nonreplicating  
780 persisters. *Science* 2014;343:204–8. <https://doi.org/10.1126/science.1244705>.
- 781 [72] Stapels DAC, Hill PWS, Westermann AJ, Fisher RA, Thurston TL, Saliba A-E,  
782 et al. *Salmonella* persisters undermine host immune defenses during antibiotic  
783 treatment. *Science* 2018;362:1156–60. <https://doi.org/10.1126/science.aat7148>.
- 784 [73] Peyrusson F, Varet H, Nguyen TK, Legendre R, Sismeiro O, Coppée J-Y, et al.  
785 Intracellular *Staphylococcus aureus* persists upon antibiotic exposure. *Nat Commun*  
786 2020;11:2200. <https://doi.org/10.1038/s41467-020-15966-7>.
- 787 [74] Ayrapetyan M, Williams TC, Baxter R, Oliver JD. Viable but Nonculturable and  
788 Persister Cells Coexist Stochastically and Are Induced by Human Serum. *Infect Immun*  
789 2015;83:4194–203. <https://doi.org/10.1128/IAI.00404-15>.

790

791

792

793

794

795

796

797

798

799

800 **Figures**

801

802

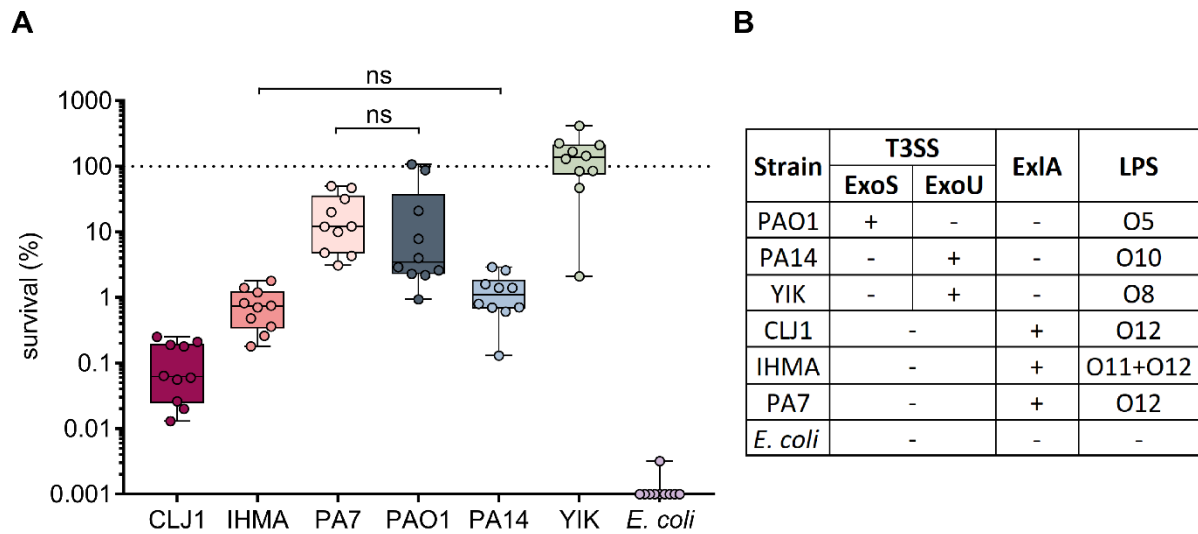

803

804 **Fig1. *P. aeruginosa* strains display various rates of resilience in the HWB model.**

805 **(A)** *P. aeruginosa* survival in blood is independent of strain origin or the secreted toxin  
806 profile (ExoU, ExoS, or ExIA). Exponentially-growing bacteria were incubated for 3 h  
807 in blood obtained from 10 different healthy donors (n=10), and bacterial survival was  
808 determined by serial dilutions and CFU counting. ns: non-significant. When not stated,  
809 differences in survival were significant. Kruskal-Wallis test,  $p < 0.001$ ; Student-  
810 Newman-Keuls post-hoc test:  $p < 0.05$ . **(B)** Nature of the toxins secreted by each strain,  
811 and serotypes of these bacteria. Note that the IHMA87 strain cross-reacts with the two  
812 antisera O11 and O12, while *E. coli* CF7968 lacks O antigens.

813

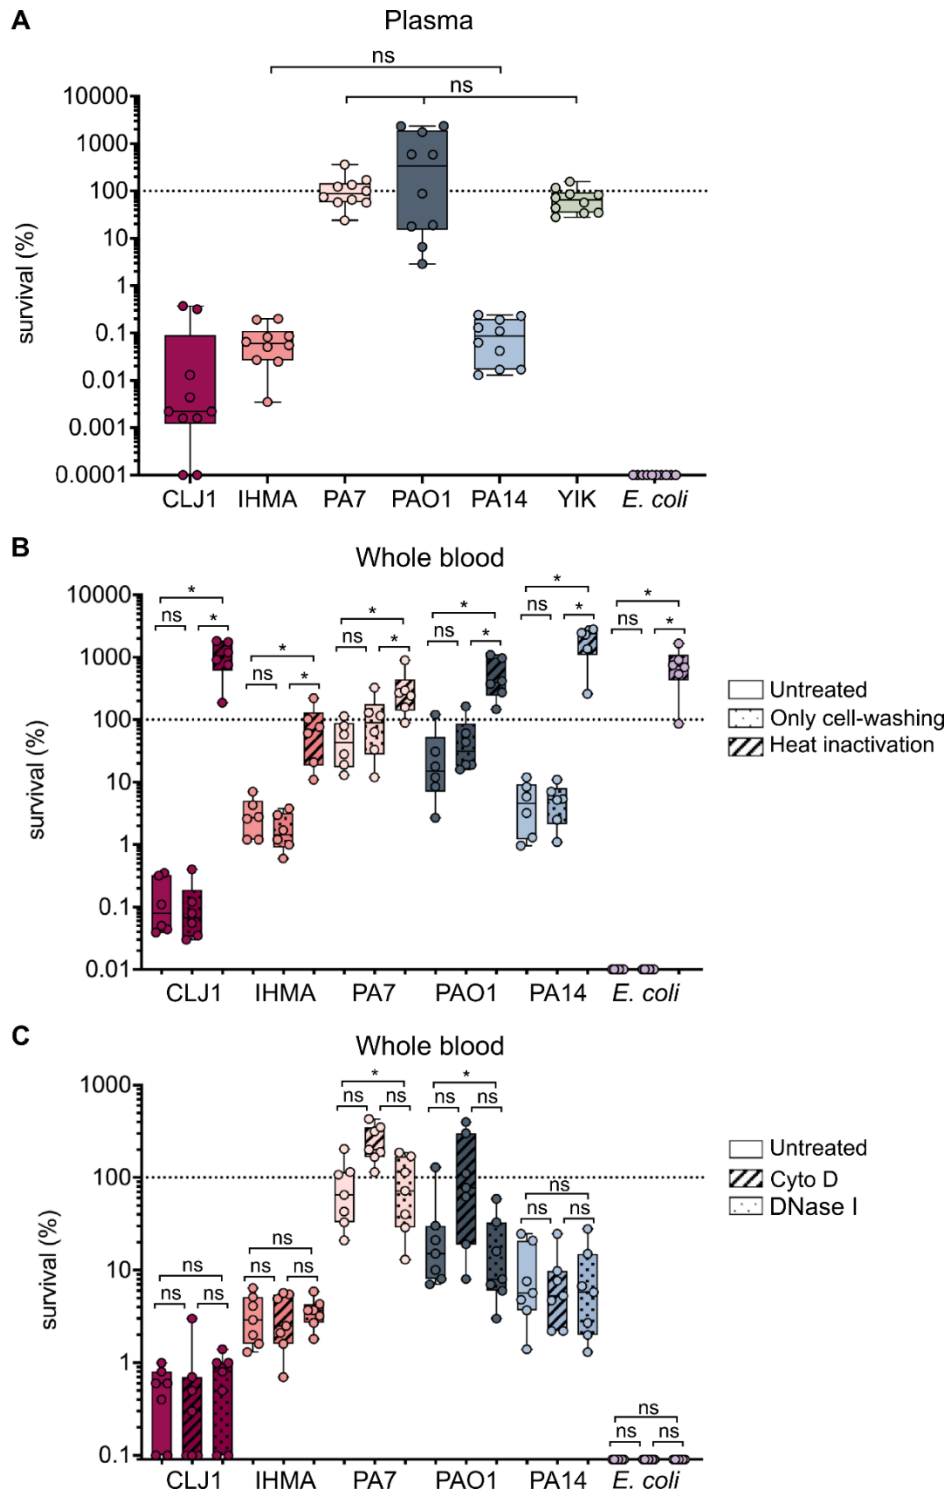

814

815 **Fig2. Complement is the main immune factor involved in bacterial clearance in**  
 816 **HWB. (A)** Survival of *P. aeruginosa* strains in human plasma. Strains were incubated  
 817 in plasma from different healthy donors (n=10), and survival was measured based on  
 818 CFU counts. ns: non-significant. When not stated, differences in survival were

819 significant. Kruskal-Wallis test,  $p < 0.001$ ; Student-Newman-Keuls post-hoc test:  $p$   
820  $< 0.05$ . Note similarities in survival profiles to those shown in Figure 1. **(B)** Heat-treating  
821 plasma prevents elimination of bacteria from HWB. Bacteria were incubated for 3 h in  
822 HWB from different donors ( $n=6$ ) with (hashed) and without (solid) heat-treatment to  
823 inactivate complement, or only with washed blood cells without plasma heating  
824 (dotted). The effect of this treatment on bacterial survival was assessed based on CFU  
825 counts. **(C)** Phagocytes are involved in the elimination of a limited number of strains.  
826 Bacteria were incubated for 3 h in HWB from different donors ( $n=7$ ) in the absence  
827 (solid) or presence of Cytochalasin D (hashed) or DNase I (dotted), to monitor the  
828 impact of these treatments on strain survival. **(B)** and **(C)**: Kruskal-Wallis test,  $p < 0.05$ ;  
829 Student-Newman-Keuls post-hoc test: \*  $p < 0.05$ .

830

831

832

833

834

835

836

837



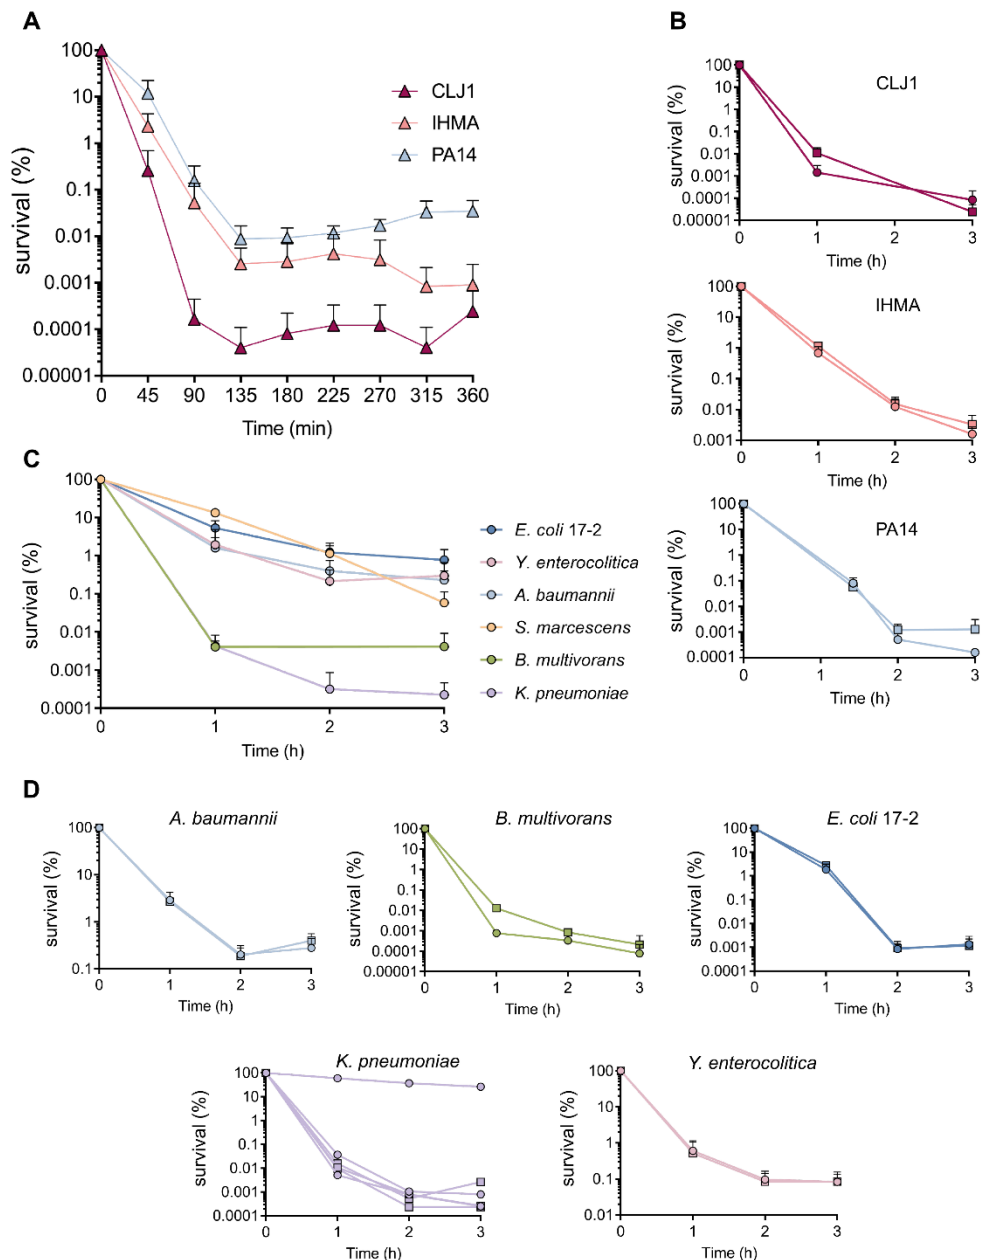

838

839 **Fig3. Evaders are rare, complement-resistant, phenotypic variants. (A)** Prolonged  
 840 exposure of *P. aeruginosa* to plasma results in killing curves reminiscent of those that  
 841 characterize persister formation. The three complement-sensitive strains PA14, CLJ1  
 842 and IHMA87 were incubated for 6 h in a pool of human plasma, and their survival was  
 843 measured every 45 min to determine the kinetics of their survival. **(C)** Evaders are a  
 844 common feature among Gram-negative bacteria. Various Gram-negative species  
 845 including *A. baumannii*, *B. multivorans*, enteroaggregative *E. coli*, *K. pneumoniae*, and

846 *Y. enterocolitica* were incubated in pooled human plasma for 3 h, and their survival  
847 was assessed hourly. **(B)** and **(D)** The evader phenotype is reversible and not the  
848 result of fixed mutations. Following a first challenge, a single “evader” colony was  
849 recultured to assess the survival of its progeny (circle) in pooled plasma during 3 h.  
850 Survival was compared to that of a population that was never exposed to complement  
851 (square). Data represent mean  $\pm$  SD of three independent experiments **(A to D)**. Note  
852 that for *K. pneumoniae* in **(D)**, the three experimental points were not pooled as one  
853 resistant mutant was isolated, presenting a survival profile different from the two other  
854 evader clones.

855

856

857

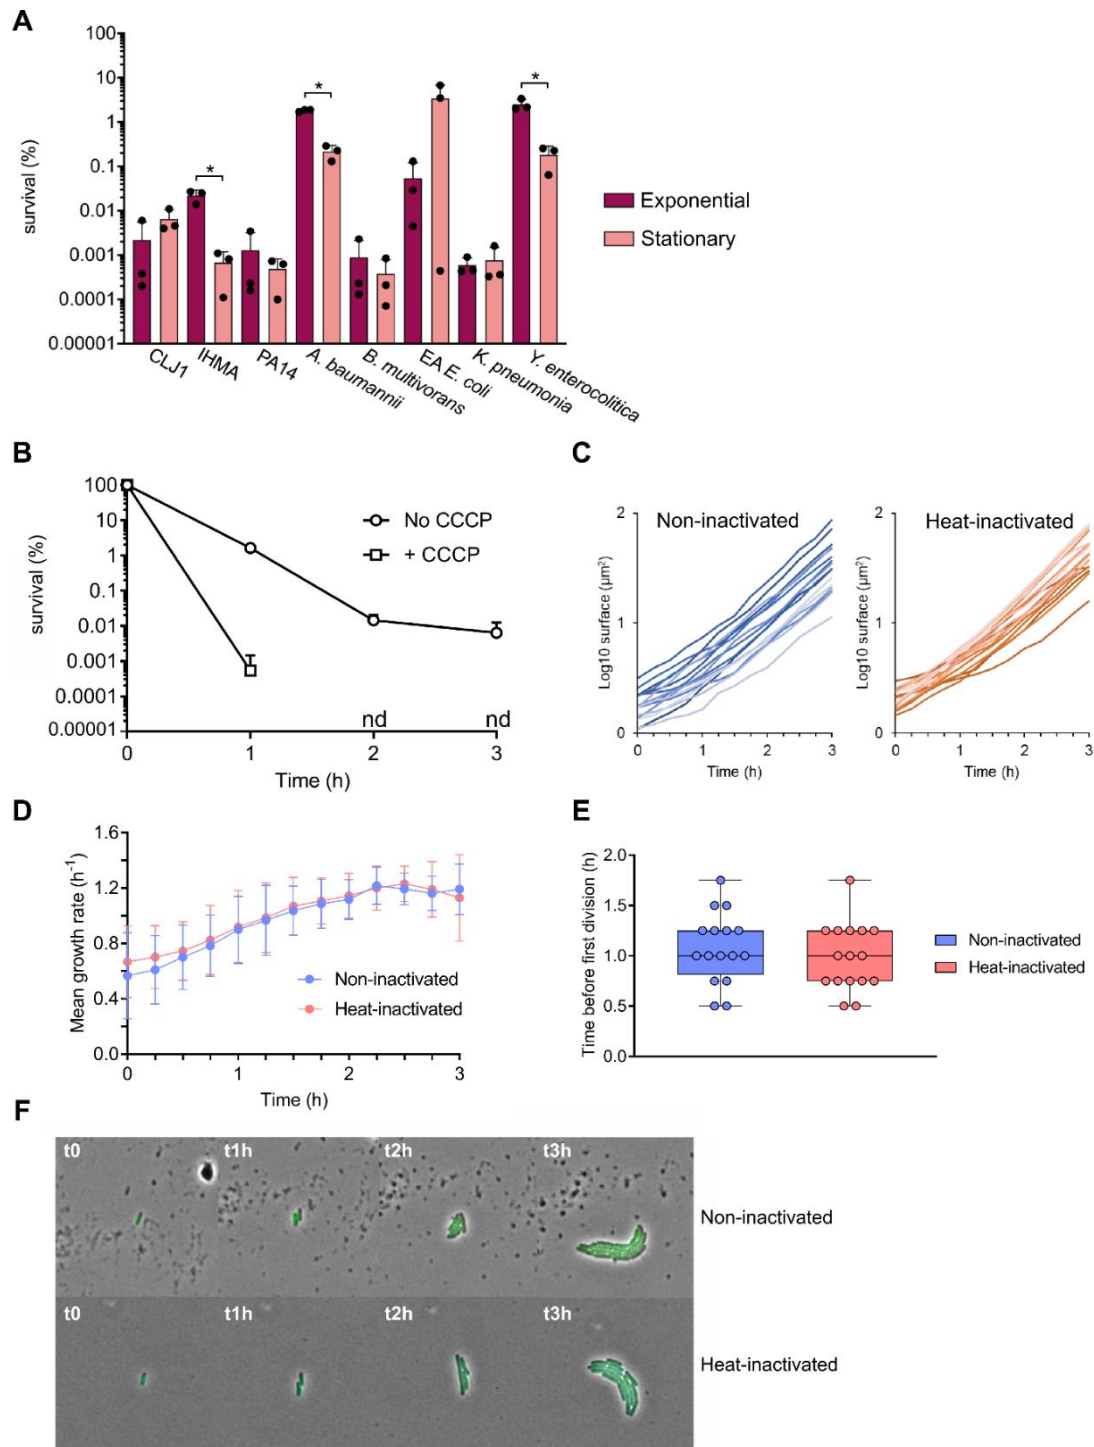

858

859 **Fig4. Complement evaders differ from antibiotic persisters.** (A) Cells in the  
 860 stationary phase do not form more evaders than exponentially growing bacteria.  
 861 Bacteria from stationary phase and exponentially growing cultures from every evader-  
 862 forming strain were challenged in a pool of plasma for 3 h to compare their ability to

863 form evaders. Student's t-test: \*  $p < 0.01$ , performed on log-transformed values. **(B)**  
864 Formation of evaders requires active metabolism. Survival kinetics of IHMA87 in a pool  
865 of plasma, following 1-h treatment with the protonophore CCCP in LB, or not. nd: non-  
866 detected. **(C) to (E)** Following stress removal, evaders show no growth defect. After  
867 3 h incubation of IHMA87-GFP in pooled plasma following heat-inactivation or not,  
868 surviving cells were recovered and spotted on a 2% agarose pad containing LB,  
869 allowing the bacteria to regrow. Using time-lapse microscopy, individual microcolony  
870 surface **(C)**, mean growth rate **(D)** and elapsed time before the first division **(E)** were  
871 determined. From two independent experiments, 16 evader cells were analyzed and  
872 compared with 16 non-evader cells from the control condition (heat-inactivated  
873 plasma). **(F)** Time-lapse microscopy of two representative microcolonies from each  
874 conditions. Data represent mean  $\pm$  SD of three independent experiments **(A and B)**.

875

876

877

878

879

880

881

882

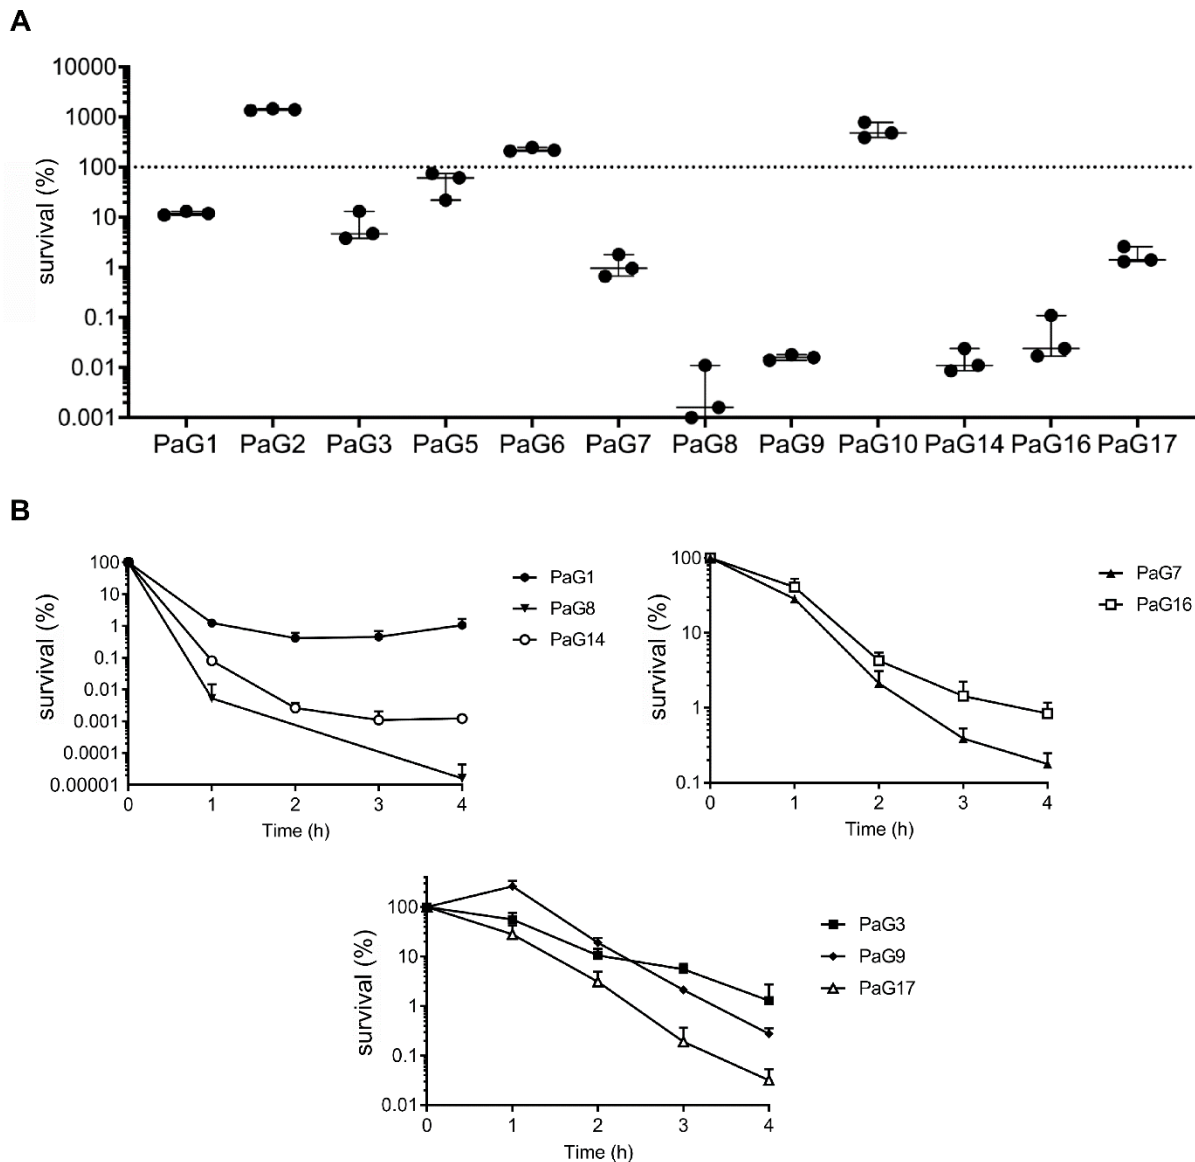

883

884 **Fig5. BSI isolates avoid elimination mainly through complement evaders. (A)**

885 Complement-resistance is not common to all BSI isolates. Twelve *P. aeruginosa*  
886 isolates from bloodstream infections were incubated in pooled plasma for 3 h, and their  
887 survival was assessed at the end of the incubation. **(B)** Most complement-sensitive  
888 isolates form evaders. Kinetics of survival in pooled plasma for 3 h of eight  
889 complement-sensitive clinical isolates. Three different panels are used for clarity and  
890 to allow better visualization of the inflection points. Data represent mean  $\pm$  SD of three  
891 independent experiments **(A and B)**.
